# Supplementary material for: Immunomodulatory and Antitumor Activity of Surface-Functionalized Lactoferrin Nanoparticles in Ovarian Carcinoma
Source: Research Square preprint supplement (doi:10.21203/rs.3.rs-8494829/v1), 2026-02-09
Supplement: Supplementary file 1 [file 54fd7780c6719cd5808ae65a.docx]

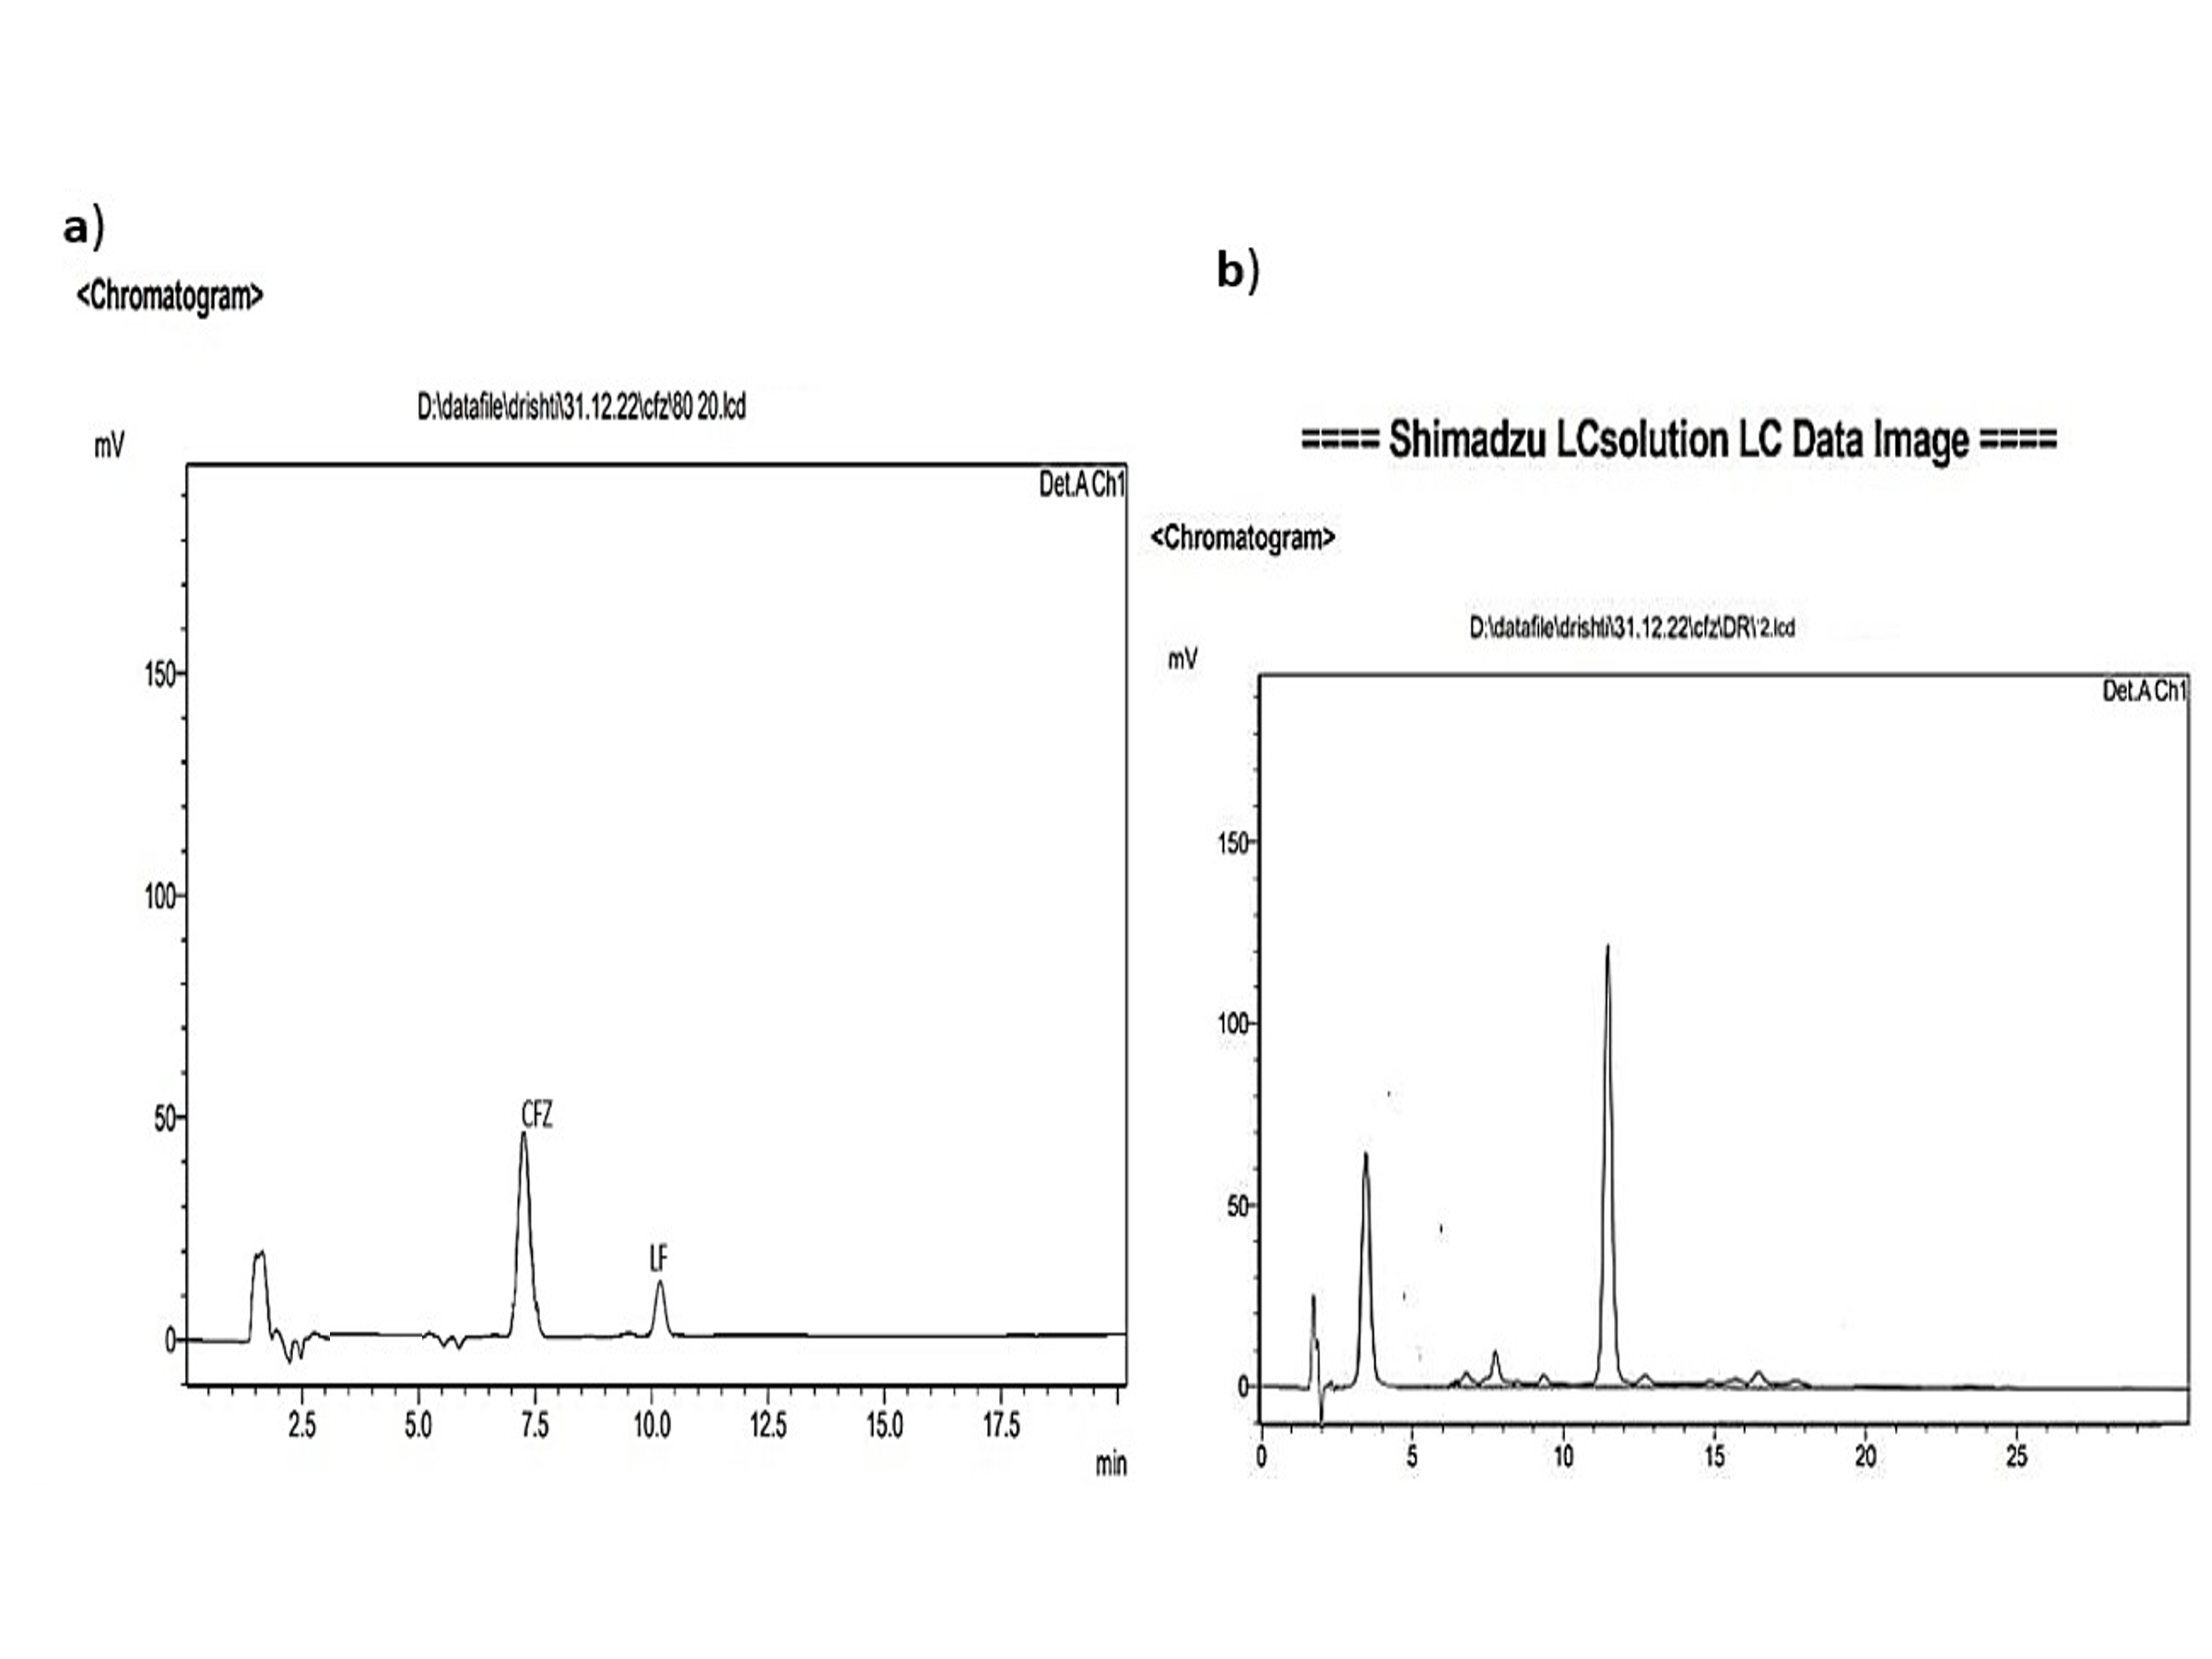
**Figure S1 HPLC chromatograms for determining %EE of CFZ: a) physical admixture of CFZ, and LF; b) Carfilzomib encapsulated lactoferrin nanoparticles (CFZ-LF-NPs)**


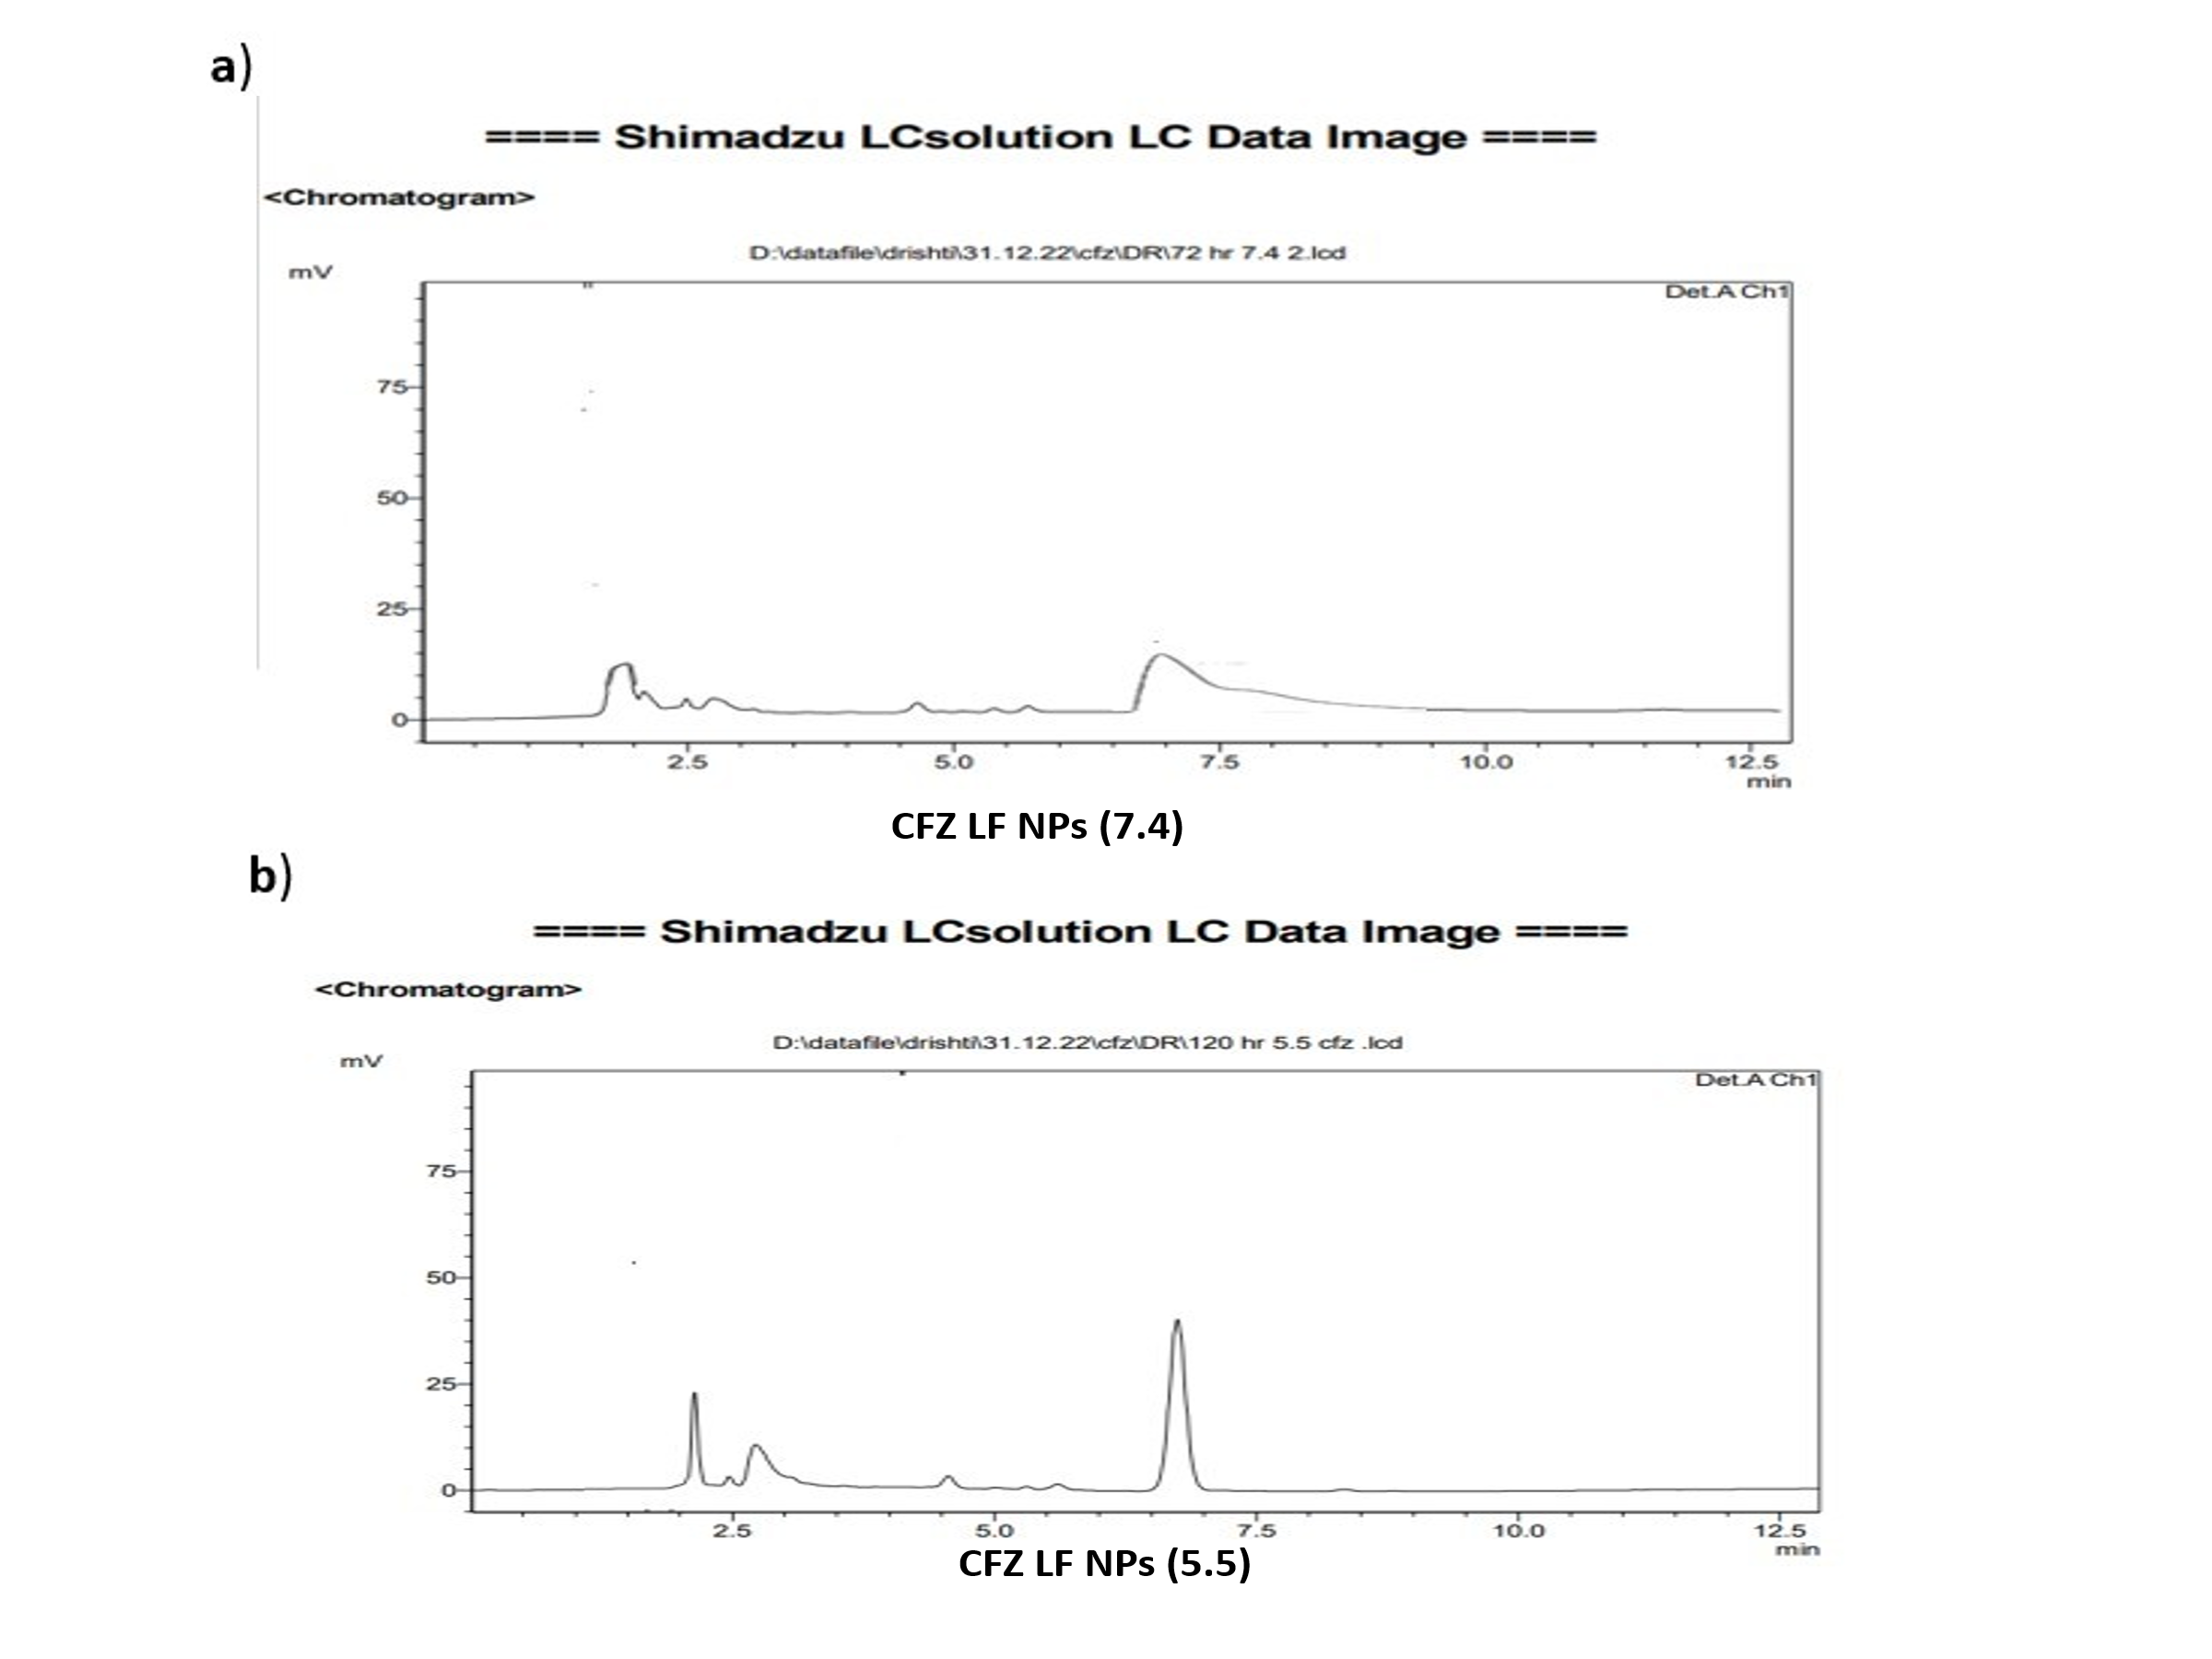


Figure S2 HPLC chromatogram of drug release samples of CFZ-LF-NPs


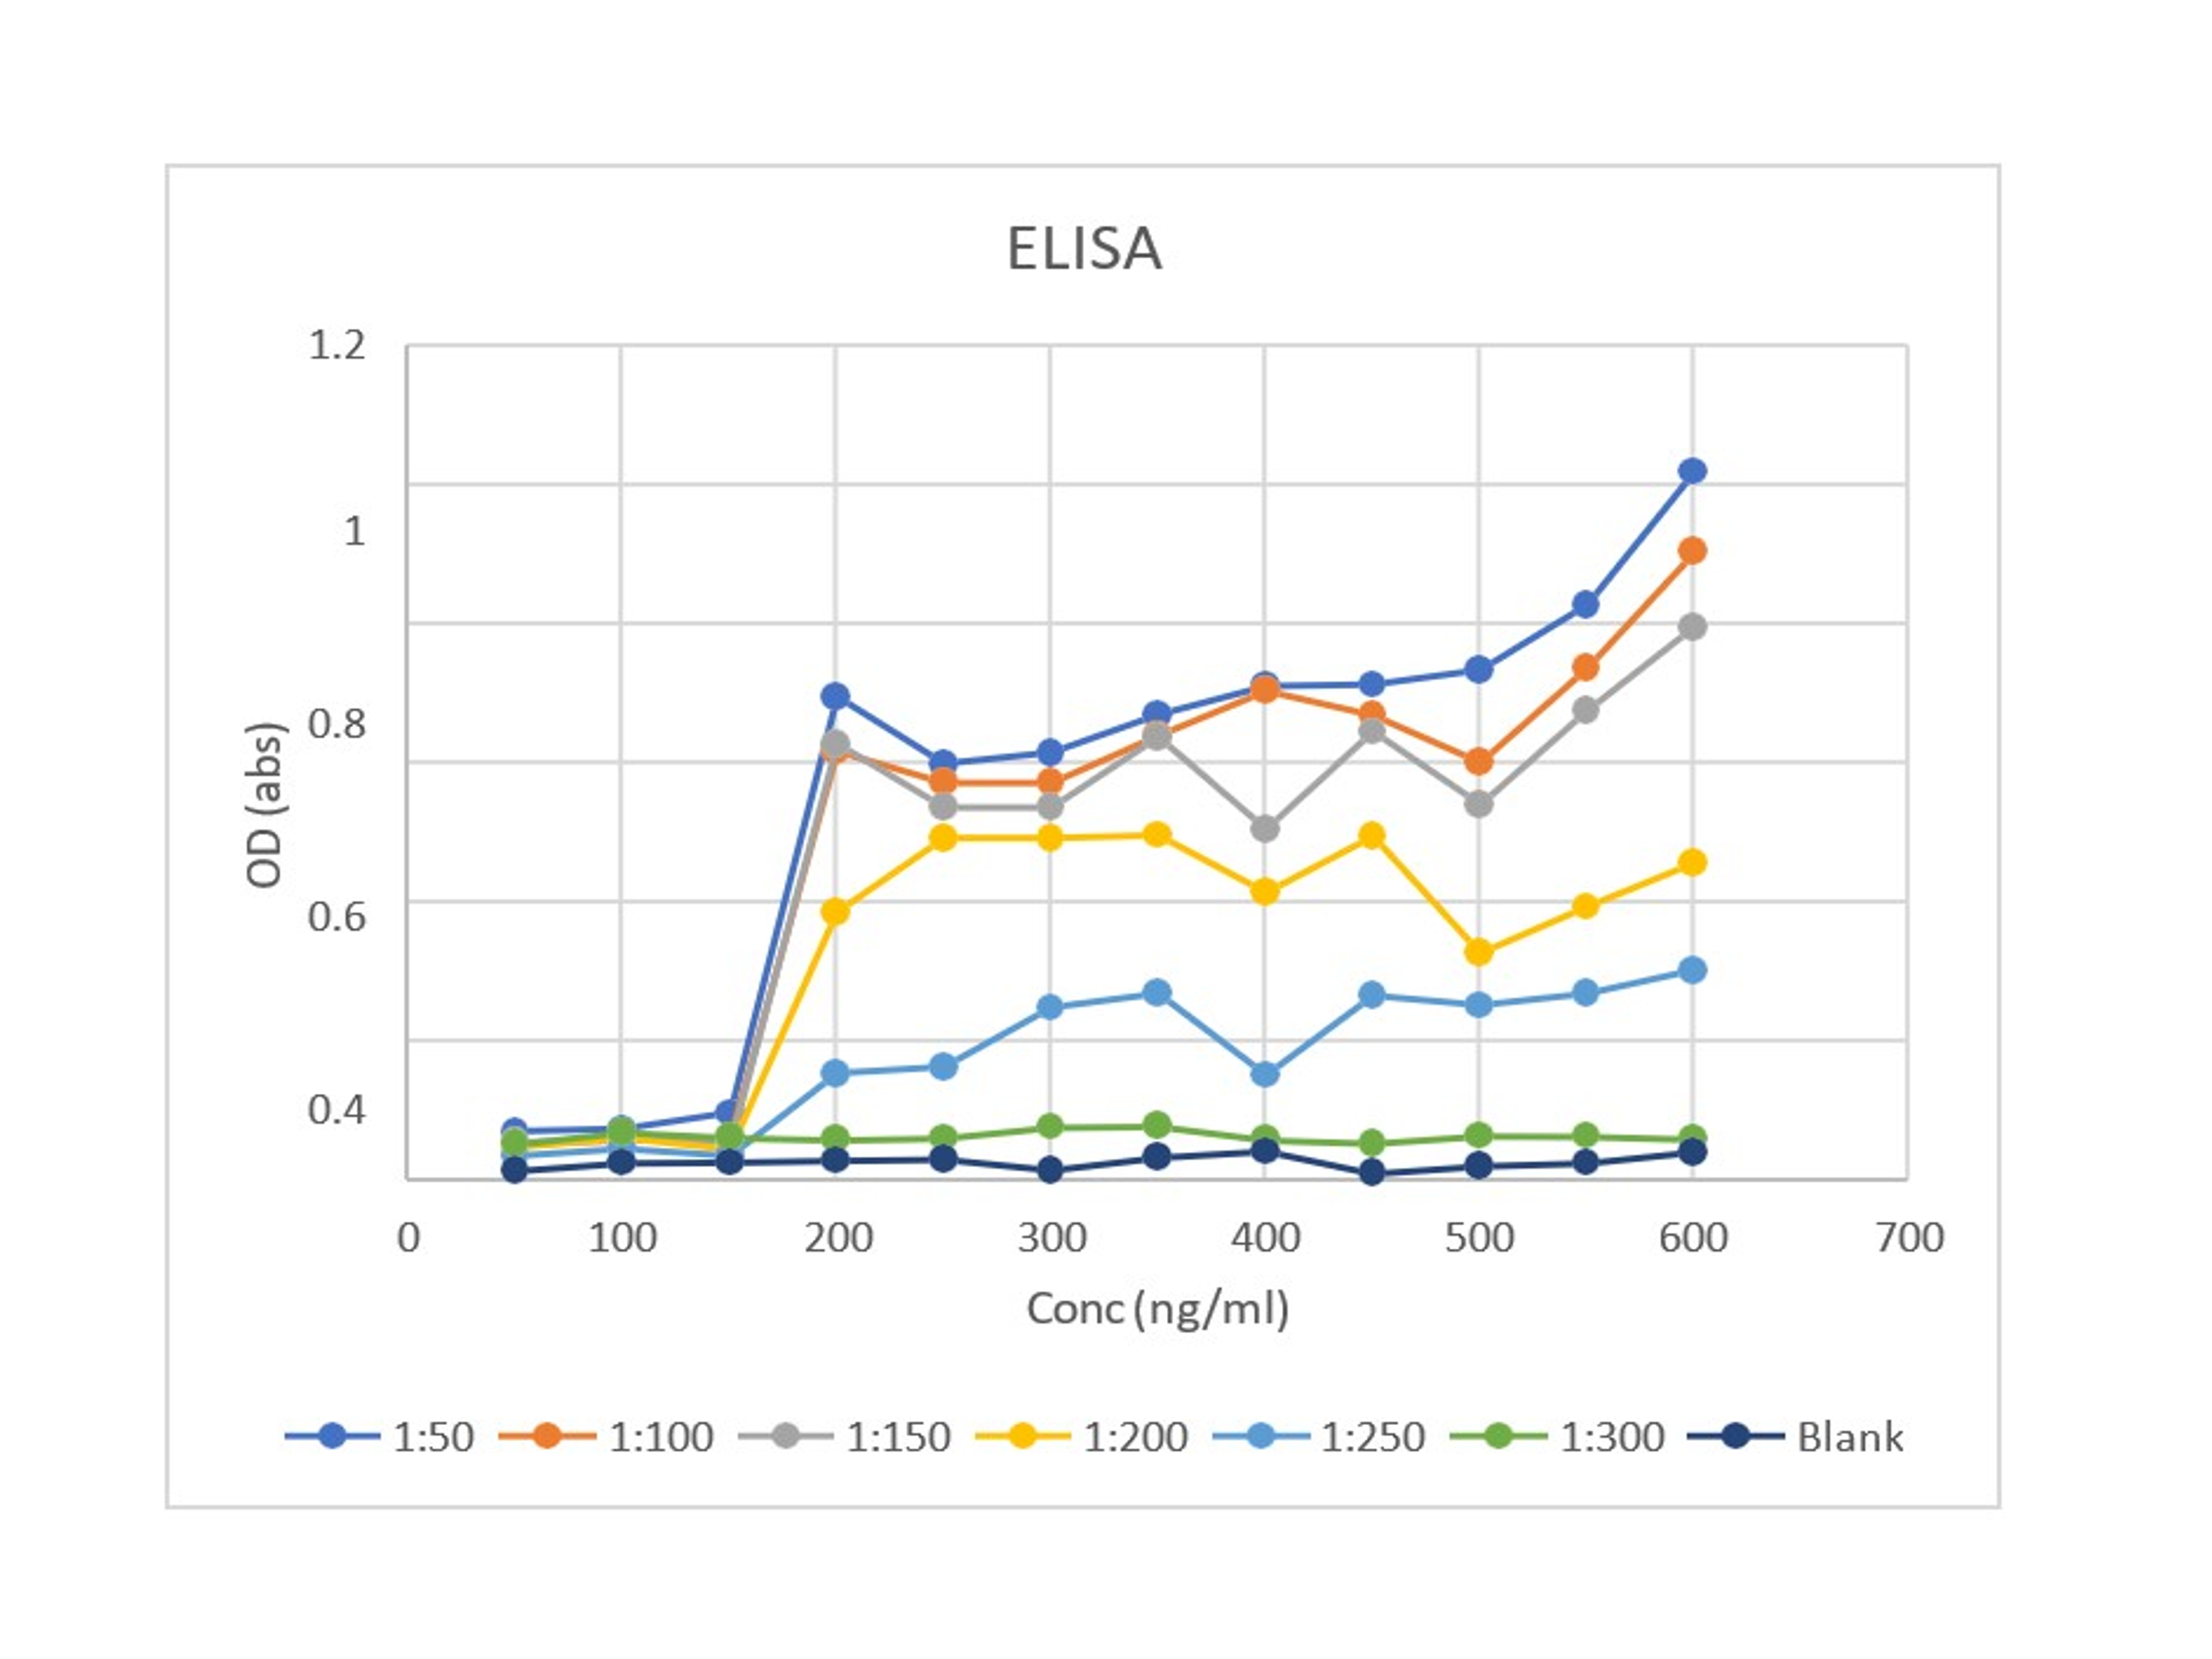


**Figure S3 Optical density via ELISA plate reading to depict the percentage of Anti- Her2 conjugation**

| **Sr.no** | **Parameters** | **CFZ-LF-NPs** | | | | | | **AntiHe2-CFZ-LF-NPs** | | | | | |
| --- | --- | --- | --- | --- | --- | --- | --- | --- | --- | --- | --- | --- | --- |
| **Storage conditions** | | | | | | **Storage conditions** | | | | | |
| **4-8°C ±2°/45%±5% RH** | | | **25°C±2°C/65±5% RH** | | | **4-8°C ±2°/45%±5% RH** | | | **25°C±2°C/65±5% RH** | | |
| **2 months** | **2 months** | **2 months** | **2 months** | **2 months** | **2 months** | **2 months** | **2 months** | **2 months** | **2 months** | **2 months** | **2 months** |
| 1 | Physical  appearance | White | White | White | White | White | White | White | White | White | White | White | White |
| 2 | Particle size  (nm) | 86.1±0.06 | 87.2±0.32 | 89±0.15 | 86.8±0.06 | 88.3±0.25 | 91.2±0.12 | 236±0.06 | 237.2±0.32 | 240±0.15 | 236.8±0.06 | 240.1±0.25 | 244.5±0.12 |
| 3 | %EE | 84.2 ± 0.017 | 82.1 ± 0.185 | 79.4 ± 0.447 | 84.2± 0.412 | 81.3 ± 0.146 | 79.4±1.247 | 87.3 ± 0.017 | 85.6 ± 0.185 | 82.1 ± 0.447 | 86.4± 0.412 | 82.7 ± 0.146 | 80.1±1.247 |

**Table S1. Stability studies of CFZ-LF-NPs and AntiHe2-CFZ-LF-NPs**
